# Supplementary material for: Perceived user preferences and usability evaluation of mainstream wearable devices for health monitoring
Source: PeerJ. 2018 Jul 25;6:e5350. doi: 10.7717/peerj.5350 (PMC6064199; doi:10.7717/peerj.5350)
Supplement: Supplemental Information 2 [file peerj-06-5350-s002.xls]

## Sheet: Experience congnitive assesment
index	totalseconds	Q1	Q2	Q3	Q4	Q5	Q6	Q7	Q8_1	Q8_2	Q8_3	Q8_4	Q8_5	Q8_6	Q8_7	Q8_8	Q8_9	Q8_10	Q8_11	Q8_12	Q8_13	Q8_14	Q8_15	Q9	Q10	Q11	Q12	Q13	Q14	Q15	Q16	Q17	Q18	Q19_1	Q19_2	Q19_3	Q19_4	Q20_1	Q20_2	Q20_3	Q20_4	Q21_1	Q21_2	Q21_3	Q21_4	Q22_1	Q22_2	Q22_3	Q22_4
1	327	6	4	2	5	4	3	3	0	0	0	0	0	0	0	0	1	0	0	0	0	0	0	3	2	4	2	3	2	4	2	3	2	4	3	4	4	4	4	4	4	4	4	4	4	4	3	3	4
2	165	6	5	1	3	5	3	5	0	0	0	0	0	0	0	0	1	0	0	0	0	0	0	4	2	4	3	4	3	4	2	4	2	5	5	4	4	4	5	5	4	4	3	4	4	4	4	5	3
3	478	6	1	1	6	4	12	5	0	1	1	0	0	1	0	0	0	0	0	0	0	0	0	5	5	3	5	5	5	5	5	5	5	5	5	5	5	5	5	5	5	5	5	5	5	5	5	5	5
4	219	9	7	1	6	5	1	5	0	0	0	0	0	0	0	1	0	0	0	0	0	0	0	5	1	5	1	5	1	3	3	5	1	5	5	5	5	5	5	5	5	5	5	5	3	5	5	5	5
5	765	7	4	1	5	3	12	5	0	0	0	0	0	0	0	0	0	1	0	0	0	0	0	4	2	3	3	2	4	4	3	4	2	3	3	3	2	3	4	4	4	2	2	2	2	4	2	3	1
6	271	6	1	1	1	3	1	1	0	1	0	1	1	0	0	0	1	1	1	1	1	1	0	3	3	3	1	3	3	4	3	1	2	3	3	4	3	3	3	3	4	3	4	4	4	3	5	5	5
7	175	6	2	1	2	4	1	1	0	0	0	0	0	0	0	0	1	0	0	0	0	0	0	5	2	5	1	4	2	5	1	3	1	3	4	4	5	3	5	3	3	3	4	5	4	3	3	3	4
8	396	6	5	2	2	4	12	1	0	0	0	0	0	0	0	0	1	0	0	0	0	0	0	2	5	3	2	2	3	4	2	2	2	5	5	5	5	5	5	5	5	3	3	3	3	2	2	3	2
9	299	1	1	1	2	4	9	3	1	0	0	0	0	0	1	0	1	0	0	0	0	0	0	4	3	3	3	4	3	4	3	3	3	5	5	5	5	5	3	5	4	4	4	2	4	4	5	5	5
10	238	6	1	1	2	4	9	3	1	0	0	0	0	0	0	0	1	0	0	0	0	0	0	4	2	5	1	3	3	4	2	3	2	4	3	4	4	5	5	3	4	4	4	4	4	4	2	2	4
11	126	6	5	1	2	4	1	1	0	0	0	0	0	0	0	0	1	0	0	0	0	0	0	4	2	5	4	4	2	4	2	3	3	5	5	5	5	5	5	5	5	5	5	5	5	5	5	2	5
12	138	6	1	1	2	4	12	1	1	1	0	0	0	0	0	0	1	0	0	0	0	0	0	1	1	1	1	1	1	1	1	1	1	1	1	1	1	1	1	1	1	1	1	1	1	1	1	1	1
13	273	1	1	2	2	5	3	1	0	0	0	0	0	0	0	0	0	0	0	0	0	0	1	5	3	4	3	4	2	4	2	4	4	5	5	5	5	5	2	5	5	5	5	5	5	5	5	5	5
14	308	3	1	2	2	5	3	1	1	0	0	0	0	0	0	0	0	0	0	0	0	0	0	5	5	5	2	4	2	3	2	4	3	4	4	4	5	4	5	4	5	5	4	5	5	5	5	4	5
15	159	4	1	1	2	3	3	2	0	0	0	0	0	0	1	0	1	0	0	0	0	0	0	2	3	3	3	3	3	4	2	3	1	2	3	4	5	5	5	5	5	5	4	4	3	5	4	3	5
16	332	1	2	1	2	5	3	2	1	1	0	1	0	1	1	1	1	1	0	0	0	0	0	4	2	3	2	4	3	2	2	4	2	4	5	4	4	4	3	4	3	3	3	4	4	4	4	4	3
17	236	2	2	1	2	5	3	2	1	1	0	1	0	1	1	1	1	1	0	0	0	0	0	3	2	4	2	4	2	2	3	4	2	2	3	4	4	4	3	3	4	4	4	4	4	3	4	3	2
18	8220	3	3	1	2	5	3	2	1	1	0	1	0	1	1	1	1	1	0	0	0	0	0	4	2	4	3	4	2	4	3	4	2	3	2	4	4	4	4	4	4	4	4	4	4	4	2	2	4
19	166	4	2	1	2	5	3	2	1	1	0	1	0	1	1	1	1	1	0	0	0	0	0	4	2	4	2	4	2	4	2	4	2	4	4	3	3	4	3	4	2	2	4	4	4	4	2	4	2
20	204	6	2	1	2	5	3	2	1	1	0	1	0	1	1	1	1	1	0	0	0	0	0	3	2	4	2	3	2	4	2	4	2	3	3	4	3	4	5	4	3	4	4	4	4	3	2	2	2
21	584	7	3	1	2	5	3	3	1	1	0	1	0	1	1	1	1	1	0	0	0	0	0	2	4	3	3	4	2	3	3	4	2	4	3	4	4	3	4	4	3	3	4	4	3	3	2	2	4
22	374	1	2	1	2	5	2	1	0	0	0	0	0	0	0	0	0	0	0	0	0	0	1	5	4	2	3	5	1	2	2	3	1	5	5	5	5	5	4	4	4	4	5	5	5	5	2	4	4
23	203	6	1	1	3	5	3	4	1	1	0	0	0	1	1	0	1	1	0	0	0	0	0	3	2	4	3	4	2	4	2	4	3	4	4	4	4	5	3	4	4	5	5	5	5	4	4	4	4
24	188	1	1	2	2	5	2	2	0	0	0	0	0	0	0	0	0	0	0	0	0	0	1	4	4	3	5	3	5	2	5	3	5	4	4	4	3	5	4	4	4	2	4	4	4	4	4	3	5
25	431	1	2	2	2	5	1	3	0	0	0	0	0	1	0	0	1	0	0	0	0	0	0	4	5	3	1	2	4	3	5	5	1	5	5	5	2	3	2	5	5	4	3	5	3	3	5	5	3
26	1344	2	2	2	2	5	1	3	1	0	0	0	0	1	0	0	1	0	0	0	0	0	0	1	5	1	5	1	5	1	5	3	5	2	2	3	2	3	3	3	3	1	1	3	1	2	3	2	1
27	455	3	2	2	2	5	1	3	1	1	0	0	0	0	0	0	1	0	0	0	0	0	0	4	1	5	1	5	1	5	1	5	1	5	2	5	5	5	5	2	5	5	5	5	5	5	3	5	5
28	376	2	2	1	3	4	1	5	0	1	0	0	0	0	0	0	1	0	0	0	0	0	0	3	2	2	2	3	4	2	5	3	3	2	2	2	4	3	2	2	2	2	2	4	3	3	2	3	2
29	360	6	4	1	6	4	9	5	0	0	0	0	0	0	0	0	1	0	0	0	0	0	0	2	5	5	1	3	1	5	1	5	1	3	4	4	4	4	4	4	1	5	5	3	4	4	3	2	4
30	306	3	1	1	2	4	1	4	0	0	0	0	0	0	0	0	1	0	0	0	0	0	0	1	3	3	3	3	5	3	4	3	5	1	3	3	2	3	4	3	3	3	3	3	3	2	2	2	3
31	712	3	2	1	2	4	3	4	0	0	0	0	0	0	0	0	1	0	0	0	0	0	0	5	4	4	3	4	2	4	2	4	3	4	5	4	4	4	4	5	5	4	3	4	4	4	4	4	4
32	295	2	2	1	3	4	1	5	0	0	0	0	0	0	1	0	1	0	0	0	0	0	0	2	4	4	2	3	3	4	2	4	1	1	1	2	4	4	4	2	4	4	4	4	4	2	3	4	3
33	179	1	2	1	2	4	1	4	1	0	0	0	0	0	0	0	0	0	0	0	0	0	0	4	4	3	4	3	4	3	4	4	3	4	4	4	4	4	4	4	4	4	4	4	4	4	4	4	4
34	789	1	2	2	3	6	1	5	0	0	0	0	0	0	0	1	0	0	0	0	0	0	0	3	4	3	1	2	4	4	2	3	1	5	5	5	2	3	2	5	5	2	3	2	2	2	2	2	4
35	819	1	2	2	4	4	1	5	0	0	0	0	0	0	0	0	1	0	0	0	0	0	0	3	3	3	2	4	3	4	3	4	3	3	4	4	3	3	3	4	3	3	3	4	4	4	3	3	3
36	1101	1	2	1	4	4	9	5	0	0	0	0	0	0	1	0	1	0	0	0	0	0	0	5	4	5	2	5	2	4	2	5	4	4	5	5	3	4	2	3	4	4	4	3	3	3	3	4	4
37	409	4	2	1	4	6	3	5	0	0	0	0	0	0	0	0	1	0	0	0	0	0	0	3	3	2	2	3	2	2	3	3	2	3	4	4	3	4	4	4	4	3	4	3	3	3	3	3	4
38	244	1	2	1	3	4	3	4	1	0	0	0	0	0	0	0	1	0	0	0	0	0	0	3	5	4	2	3	3	3	2	4	4	4	4	4	4	4	4	4	4	4	4	4	4	4	4	4	4
39	279	2	2	1	2	4	1	5	0	1	0	0	0	0	0	0	0	0	0	0	0	0	0	3	4	2	4	3	4	3	3	3	3	4	4	4	2	3	2	3	3	3	3	3	3	3	3	3	3
40	398	1	1	2	2	4	1	4	0	0	0	0	0	0	0	0	0	0	0	0	0	0	1	1	3	3	2	4	3	3	2	3	2	3	5	4	3	3	2	5	4	3	4	5	4	2	2	4	5
41	559	2	2	2	4	4	3	5	0	1	0	0	0	0	0	0	0	0	0	0	0	0	0	3	2	4	2	4	2	4	2	3	2	3	4	4	4	4	3	4	4	4	4	4	4	4	4	3	4
42	739	3	2	1	3	4	1	4	0	0	0	0	0	0	0	0	1	0	0	0	0	0	0	5	2	5	1	4	2	5	1	5	2	4	5	4	4	4	3	4	4	4	4	4	4	4	2	4	1
43	362	6	1	2	2	4	1	4	0	0	0	0	0	0	0	0	1	0	0	0	0	0	0	3	5	4	3	4	3	3	3	4	2	4	4	3	4	4	4	3	3	3	3	4	4	3	4	4	4
44	253	1	1	1	2	4	1	4	0	0	0	0	0	0	0	0	0	0	0	0	0	0	1	3	3	3	3	3	3	3	3	2	2	4	4	3	2	3	3	3	3	3	3	3	3	3	3	3	3
45	116	1	1	2	2	4	1	4	1	0	0	0	0	0	0	0	0	0	0	0	0	0	0	3	3	3	3	3	3	3	3	3	3	3	3	3	3	3	3	3	3	3	3	3	3	3	3	3	3
46	355	6	2	1	3	4	3	5	0	0	0	0	0	1	0	0	0	1	0	1	0	0	0	2	4	4	1	3	5	3	2	1	1	3	2	3	3	3	3	3	3	2	2	3	3	3	3	3	3
47	499	1	2	1	3	4	1	5	1	0	0	0	0	0	0	0	0	0	0	0	0	0	0	1	3	2	4	3	5	2	4	3	4	3	3	3	2	3	3	3	3	2	3	3	2	3	3	3	3
48	146	6	2	1	3	4	6	4	0	1	0	0	0	0	0	0	0	0	0	0	0	0	0	3	3	3	3	2	1	5	3	3	3	2	3	2	2	4	4	3	2	2	3	4	3	2	3	3	4
49	167	2	2	2	2	4	1	4	0	1	0	0	0	0	0	0	0	0	0	0	0	0	0	3	3	3	3	4	3	2	2	3	3	3	3	3	3	3	3	3	3	3	3	3	3	3	3	3	3
50	291	6	1	1	3	4	1	5	0	0	0	0	0	0	0	0	0	0	0	0	0	0	1	3	3	3	3	2	4	2	3	2	3	2	2	2	2	3	3	3	3	3	3	3	3	3	3	3	3
51	313	6	1	1	2	4	6	4	0	0	0	0	0	0	0	0	1	0	0	0	0	0	0	3	2	4	2	3	4	4	2	2	2	3	2	3	3	3	3	3	4	3	4	4	4	3	2	2	2
52	1802	6	1	2	4	4	1	4	0	0	0	0	0	0	0	0	1	0	0	0	0	0	0	4	1	3	2	3	2	2	2	2	2	4	4	4	4	4	4	4	4	3	3	3	3	4	4	4	4
53	3721	1	2	1	3	4	1	4	0	0	0	0	0	0	0	0	1	0	0	0	0	0	0	4	3	5	2	3	4	3	2	4	2	4	4	4	3	4	2	4	4	3	3	4	4	4	3	4	4
54	136	1	2	2	2	4	1	4	1	0	0	0	0	0	0	0	0	0	0	0	0	0	0	4	3	4	4	3	4	3	4	3	4	3	4	3	4	3	4	3	3	4	3	4	3	3	4	4	3
55	145	2	1	1	2	4	1	5	1	1	0	0	0	0	0	0	0	0	0	0	0	0	0	4	4	4	2	3	3	4	3	4	3	4	4	2	3	3	3	3	3	3	3	3	3	3	3	3	3
56	283	3	1	2	2	4	1	4	0	0	0	0	0	0	0	0	1	0	0	0	0	0	0	2	5	4	3	4	3	2	4	2	3	3	4	3	3	4	4	4	4	4	3	4	4	4	4	4	4
57	345	3	1	2	4	3	1	4	0	0	0	0	0	0	0	0	1	0	0	0	0	0	0	3	5	3	4	3	3	3	3	3	3	2	2	4	3	3	4	4	4	3	3	3	2	3	3	3	3
58	484	9	2	1	3	4	1	4	0	0	0	0	0	0	0	0	1	0	0	0	0	0	0	5	1	5	1	5	1	5	1	5	1	4	5	4	5	5	5	5	4	5	4	4	5	5	3	5	5
59	864	9	3	1	2	5	3	2	1	1	0	1	0	1	1	1	1	1	0	0	0	0	0	4	2	4	4	3	2	2	2	4	2	4	4	4	3	4	4	4	2	4	3	4	3	3	2	3	2
60	481	9	3	1	3	5	3	2	1	1	1	0	0	1	1	1	1	1	0	0	0	0	0	3	1	2	4	1	5	2	4	4	4	4	5	4	2	5	5	5	5	2	2	2	3	3	2	2	2
61	357	4	6	1	1	1	12	1	0	0	0	0	0	1	1	1	0	0	0	0	0	0	1	5	2	4	1	3	2	5	1	5	1	5	5	5	3	5	5	5	3	4	3	5	5	5	5	5	5
63	1032	9	6	2	4	4	3	5	0	0	0	0	0	0	0	1	0	0	0	0	0	0	0	3	1	4	1	4	3	4	3	3	2	3	4	4	3	4	4	4	4	4	4	2	3	4	3	4	3
64	220	9	6	2	3	5	6	5	0	0	0	0	0	0	0	1	0	0	0	0	0	0	0	3	3	5	4	3	3	5	3	3	3	3	3	4	3	5	3	3	3	5	5	5	4	3	3	3	3
65	392	2	1	2	3	5	3	2	0	0	0	0	0	0	0	0	1	0	0	0	0	0	0	2	4	3	3	3	4	3	3	2	2	2	3	3	3	4	4	4	4	2	3	4	4	3	3	3	2
66	252	6	1	1	4	4	12	2	0	0	0	0	0	0	1	1	1	0	0	0	0	0	0	5	3	5	1	1	3	3	1	3	1	3	3	4	4	3	3	3	3	3	4	4	4	3	3	2	4
67	377	1	5	2	3	4	3	4	1	0	0	0	0	0	0	0	0	0	0	0	0	0	0	4	3	4	2	3	4	4	2	4	2	4	4	4	4	4	2	2	4	4	4	4	4	3	4	4	3
68	346	3	5	2	3	6	3	3	0	0	0	0	0	1	0	0	0	0	0	0	0	0	0	4	2	5	1	5	2	5	1	5	1	4	3	4	4	4	3	4	4	4	4	3	4	4	4	4	3
69	259	6	5	1	3	4	1	5	0	0	0	0	0	0	0	0	1	0	0	0	0	0	0	5	4	2	1	5	4	2	4	5	5	4	2	4	4	5	5	4	4	3	4	4	4	3	4	3	4
70	436	6	5	1	4	2	8	1	0	0	0	0	0	0	0	0	1	0	0	0	0	0	0	5	5	5	1	4	3	5	1	1	1	3	3	3	5	5	4	3	3	5	4	4	5	5	1	2	3
71	237	1	1	1	4	4	12	5	1	0	0	0	1	1	0	0	0	0	0	0	0	0	0	5	5	5	5	5	5	5	5	5	5	5	5	4	4	5	5	5	5	4	4	5	5	4	4	5	5
72	633	6	5	2	5	4	12	5	1	0	1	0	0	0	0	0	1	0	0	0	0	0	0	4	3	4	2	4	2	3	3	3	3	4	4	4	4	4	4	4	4	4	4	4	4	3	3	4	4
73	549	6	5	2	4	4	1	5	0	0	0	0	0	0	0	0	1	0	0	0	0	0	0	4	3	4	2	3	2	4	2	3	1	4	3	4	4	4	4	3	4	4	4	4	4	3	3	4	4
74	339	6	7	1	4	4	3	4	0	0	0	0	0	0	0	0	1	0	0	0	0	0	1	5	5	5	1	5	1	5	1	5	1	5	4	5	3	5	5	4	5	5	3	5	4	4	1	3	5
75	1101	6	6	1	2	4	2	5	0	0	0	0	0	0	0	0	1	0	0	0	0	0	0	5	5	4	1	5	3	5	1	5	1	5	3	5	4	5	5	4	1	4	5	3	4	4	3	5	2
76	315	4	4	1	3	4	1	5	0	0	0	0	0	1	1	0	1	0	0	0	0	0	0	5	3	5	2	4	3	4	1	5	1	5	4	4	2	5	4	3	3	4	5	5	5	2	2	2	2
77	545	2	5	1	4	3	9	5	0	0	0	0	0	0	0	0	0	1	0	0	0	0	0	5	5	5	5	5	1	5	1	5	3	4	4	4	5	4	3	4	4	3	4	4	4	4	4	4	4
78	342	1	3	1	2	4	1	4	1	0	0	0	0	0	0	0	0	0	0	0	0	0	0	5	4	4	4	4	3	5	4	4	3	5	5	5	4	3	3	4	5	4	3	4	4	4	3	4	4
79	328	2	3	1	2	5	3	2	1	0	0	0	0	0	0	0	0	0	0	0	0	0	0	2	5	3	2	2	4	4	2	2	2	1	2	2	3	3	4	3	2	2	2	3	2	2	1	2	3
80	280	6	5	1	2	4	1	3	0	0	0	0	0	0	0	0	1	0	0	0	0	0	0	3	3	1	2	2	3	1	1	2	2	2	2	2	2	4	5	2	3	2	3	3	3	3	3	3	3
81	916	2	2	1	2	3	10	4	0	0	0	0	0	0	0	0	1	0	0	0	0	0	0	4	4	4	3	3	4	4	4	2	2	3	3	3	3	3	3	3	3	3	3	3	3	3	3	3	3
82	407	6	6	2	3	5	3	2	0	0	0	0	0	0	0	0	1	0	0	0	0	0	0	5	3	5	3	4	1	4	1	4	3	5	5	5	5	5	5	5	5	5	5	5	5	5	5	3	4
83	252	3	2	1	5	6	6	4	0	0	0	0	0	1	0	0	0	0	0	0	0	0	0	1	1	3	5	1	3	1	5	3	3	3	3	4	1	3	3	3	3	2	2	2	2	3	3	3	3
85	443	1	2	2	4	6	6	4	1	0	0	0	0	0	0	0	0	0	0	0	0	0	0	3	2	4	1	3	2	3	3	4	2	2	4	3	3	4	2	3	4	3	4	4	3	4	4	4	3
86	601	1	2	1	4	6	3	5	1	0	0	0	0	0	0	0	0	0	0	0	0	0	0	4	1	4	1	4	2	5	1	5	1	5	5	5	5	5	3	5	5	4	3	4	5	4	2	5	3
87	369	7	2	2	2	5	12	1	0	0	0	0	0	0	0	1	0	1	0	0	0	0	0	2	3	3	2	2	2	3	2	3	2	4	4	4	2	3	1	3	3	3	3	3	3	3	3	2	2
88	825	1	2	1	5	5	1	4	0	0	0	0	0	0	1	0	0	0	0	0	0	0	0	5	5	3	4	3	3	3	4	3	3	5	4	5	4	5	3	5	5	4	4	4	4	3	3	3	3
89	419	9	2	1	2	4	1	1	0	0	0	0	0	0	0	1	0	0	0	0	0	0	0	2	2	4	1	3	2	4	2	4	2	3	4	4	2	4	4	3	3	2	4	4	2	2	1	2	4
90	651	4	2	1	5	4	12	5	0	0	0	0	0	1	0	0	0	0	0	0	0	0	0	2	4	4	2	2	3	2	4	4	3	3	4	4	3	3	4	3	4	3	3	4	3	3	2	3	3
91	1086	4	2	1	6	4	12	5	0	0	0	0	0	0	1	0	0	0	0	0	0	0	0	4	2	4	2	3	3	4	2	5	2	4	4	4	4	4	3	4	4	3	4	3	4	4	3	3	4
92	372	1	2	1	2	6	3	2	0	0	0	0	0	0	0	0	1	0	0	0	0	0	0	2	1	4	4	5	4	4	2	5	2	5	5	5	5	4	2	5	4	4	4	5	5	4	4	4	3
93	442	3	2	1	2	6	3	2	0	0	0	0	0	0	0	0	1	0	0	0	0	0	0	2	2	5	3	3	4	5	2	4	2	2	3	4	4	4	5	3	4	5	5	4	4	4	3	3	3
94	310	1	3	2	4	3	2	5	0	0	0	0	0	0	0	0	0	0	0	0	0	0	1	5	3	5	1	4	4	4	2	4	2	4	4	4	3	4	4	4	4	4	4	4	4	3	3	3	4
95	379	7	2	1	2	5	3	2	1	0	0	0	0	0	0	0	1	0	0	0	0	0	0	3	4	4	2	4	2	2	3	4	2	4	4	4	4	4	3	4	4	3	4	4	3	2	2	2	4
96	193	9	2	2	2	5	3	2	0	0	0	0	0	0	0	0	1	0	0	0	0	0	0	4	2	3	2	2	3	4	2	4	2	4	4	4	2	4	4	4	2	4	4	4	2	2	2	2	3
97	316	3	2	1	5	4	7	5	1	0	0	0	0	1	1	0	0	0	0	0	0	0	0	3	3	3	4	3	2	4	2	3	3	3	4	3	2	3	3	4	4	4	3	4	3	3	3	4	3
98	8553	4	2	1	4	6	2	5	0	0	0	0	0	0	1	0	0	0	0	0	0	0	0	2	3	3	1	3	2	4	2	4	2	5	4	4	4	4	4	4	4	4	4	4	4	4	4	4	4
99	458	2	1	2	2	4	3	1	0	0	0	0	0	0	0	0	1	0	0	0	0	0	0	5	2	5	3	4	2	5	2	4	2	3	3	4	4	5	4	3	3	3	4	4	3	4	4	4	4
100	390	4	1	2	2	4	3	1	0	1	0	0	0	0	0	0	1	0	0	0	0	0	0	5	1	5	1	5	2	5	2	5	1	4	3	3	3	5	4	3	3	5	5	4	4	4	4	3	4
101	5050	4	2	1	2	4	1	5	0	0	0	0	0	0	1	0	1	0	0	0	0	0	0	4	5	2	4	3	5	2	4	3	5	5	5	5	3	5	1	5	5	2	2	2	4	4	4	5	5
[truncated: 42 more columns]

## Sheet: 24
Q24_选项1	Q24_选项2	Q24_选项3	Q24_选项4	Q24_选项5	Q24_选项6	Q24_选项7	Q24_选项8	Q24_选项9	Q24_选项10	Q24_选项11	Q24_选项12	Q24_选项13	Q24_选项14		Q24_选项1	Q24_选项2	Q24_选项3	Q24_选项4	Q24_选项5	Q24_选项6	Q24_选项7	Q24_选项8	Q24_选项9	Q24_选项10	Q24_选项11	Q24_选项12	Q24_选项13	Q24_选项14
1	0	2	0	0	0	3	4	0	0	0	0	0	0	4	4	0	3	0	0	0	2	1	0	0	0	0	0	0
0	2	1	0	0	0	0	0	0	0	0	0	0	0	2	0	1	2	0	0	0	0	0	0	0	0	0	0	0
5	4	6	1	2	7	3	8	9	10	11	12	13	14	14	10	11	9	14	13	8	12	7	6	5	4	3	2	1
1	3	2	0	0	0	0	0	0	0	0	0	0	0	3	3	1	2	0	0	0	0	0	0	0	0	0	0	0
1	0	2	3	4	12	5	13	8	9	6	10	11	7	13	13	0	12	11	10	2	9	1	6	5	8	4	3	7
1	2	3	4	12	5	6	13	7	8	14	9	10	11	14	14	13	12	11	3	10	9	2	8	7	1	6	5	4
4	3	1	2	0	0	0	0	0	0	0	0	0	0	4	1	2	4	3	0	0	0	0	0	0	0	0	0	0
3	0	1	0	0	0	0	0	0	0	0	2	0	0	3	1	0	3	0	0	0	0	0	0	0	0	2	0	0
1	0	5	6	7	0	0	0	0	2	3	4	8	9	9	9	0	5	4	3	0	0	0	0	8	7	6	2	1
1	4	5	6	0	0	0	0	0	2	3	7	8	9	9	9	6	5	4	0	0	0	0	0	8	7	3	2	1
1	0	2	0	0	0	0	0	0	0	0	0	0	0	2	2	0	1	0	0	0	0	0	0	0	0	0	0	0
1	2	3	4	8	5	6	7	9	12	10	11	13	14	14	14	13	12	11	7	10	9	8	6	3	5	4	2	1
0	0	4	5	6	0	0	0	2	3	0	1	0	0	6	0	0	3	2	1	0	0	0	5	4	0	6	0	0
5	4	3	2	6	8	7	0	1	9	0	0	0	0	9	5	6	7	8	4	2	3	0	9	1	0	0	0	0
1	2	3	4	5	6	7	0	8	9	10	11	13	12	13	13	12	11	10	9	8	7	0	6	5	4	3	1	2
3	0	4	2	0	0	5	0	0	1	6	0	0	0	6	4	0	3	5	0	0	2	0	0	6	1	0	0	0
5	0	0	3	6	0	0	0	0	2	4	0	0	1	6	2	0	0	4	1	0	0	0	0	5	3	0	0	6
5	6	0	2	0	0	0	0	4	3	0	0	0	1	6	2	1	0	5	0	0	0	0	3	4	0	0	0	6
6	5	0	2	0	0	0	0	4	3	0	0	0	1	6	1	2	0	5	0	0	0	0	3	4	0	0	0	6
6	5	0	2	0	0	0	0	3	4	0	0	0	1	6	1	2	0	5	0	0	0	0	4	3	0	0	0	6
6	5	0	4	0	0	0	0	3	2	0	0	0	1	6	1	2	0	3	0	0	0	0	4	5	0	0	0	6
1	0	0	2	0	0	0	0	0	0	3	0	4	0	4	4	0	0	3	0	0	0	0	0	0	2	0	1	0
1	3	2	0	0	0	4	0	0	0	0	5	0	0	5	5	3	4	0	0	0	2	0	0	0	0	1	0	0
1	2	0	3	0	0	0	0	0	0	0	0	0	0	3	3	2	0	1	0	0	0	0	0	0	0	0	0	0
1	7	6	8	14	13	9	5	2	12	4	3	10	11	14	14	8	9	7	1	2	6	10	13	3	11	12	5	4
1	9	14	13	12	10	11	2	8	3	5	4	7	6	14	14	6	1	2	3	5	4	13	7	12	10	11	8	9
1	2	7	8	14	13	9	6	10	5	4	3	12	11	14	14	13	8	7	1	2	6	9	5	10	11	12	3	4
1	3	2	4	7	6	5	14	13	8	9	10	11	12	14	14	12	13	11	8	9	10	1	2	7	6	5	4	3
1	2	3	0	0	0	0	4	0	0	0	0	0	0	4	4	3	2	0	0	0	0	1	0	0	0	0	0	0
1	0	0	0	0	0	0	2	0	0	0	0	3	0	3	3	0	0	0	0	0	0	2	0	0	0	0	1	0
1	4	2	0	0	0	3	0	5	0	0	0	0	0	5	5	2	4	0	0	0	3	0	1	0	0	0	0	0
6	13	12	1	2	5	11	10	3	7	9	8	14	4	14	9	2	3	14	13	10	4	5	12	8	6	7	1	11
1	2	3	4	5	6	8	7	10	9	11	12	14	13	14	14	13	12	11	10	9	7	8	5	6	4	3	1	2
1	2	12	13	14	3	5	4	6	7	8	9	10	11	14	14	13	3	2	1	12	10	11	9	8	7	6	5	4
0	0	1	2	0	3	0	0	0	4	0	5	0	0	5	0	0	5	4	0	3	0	0	0	2	0	1	0	0
4	5	6	8	7	9	10	11	12	3	1	2	13	14	14	11	10	9	7	8	6	5	4	3	12	14	13	2	1
1	3	2	8	9	10	4	11	12	5	6	7	13	14	14	14	12	13	7	6	5	11	4	3	10	9	8	2	1
2	1	3	4	9	5	7	8	6	13	14	10	12	11	14	13	14	12	11	6	10	8	7	9	2	1	5	3	4
3	0	0	0	0	0	4	0	0	0	0	1	2	0	4	2	0	0	0	0	0	1	0	0	0	0	4	3	0
1	2	3	4	6	5	0	7	0	0	0	0	9	8	9	9	8	7	6	4	5	0	3	0	0	0	0	1	2
1	0	2	3	5	4	0	0	0	0	0	0	0	0	5	5	0	4	3	1	2	0	0	0	0	0	0	0	0
1	0	3	6	0	0	4	2	0	5	0	0	0	0	6	6	0	4	1	0	0	3	5	0	2	0	0	0	0
3	5	1	4	6	0	2	0	0	0	0	0	0	0	6	4	2	6	3	1	0	5	0	0	0	0	0	0	0
1	0	0	0	0	0	0	4	0	0	0	0	2	3	4	4	0	0	0	0	0	0	1	0	0	0	0	3	2
1	5	4	6	3	2	10	9	11	7	8	14	13	12	14	14	10	11	9	12	13	5	6	4	8	7	1	2	3
0	0	0	1	2	0	0	0	0	0	0	5	3	4	5	0	0	0	5	4	0	0	0	0	0	0	1	3	2
3	0	1	2	0	0	0	0	0	0	0	0	0	0	3	1	0	3	2	0	0	0	0	0	0	0	0	0	0
5	1	2	3	4	6	7	8	9	10	11	12	13	14	14	10	14	13	12	11	9	8	7	6	5	4	3	2	1
1	2	3	0	0	5	4	0	0	0	7	8	6	0	8	8	7	6	0	0	4	5	0	0	0	2	1	3	0
4	3	1	2	0	0	0	0	0	0	0	0	0	0	4	1	2	4	3	0	0	0	0	0	0	0	0	0	0
1	0	0	0	0	0	0	2	0	0	0	0	3	0	3	3	0	0	0	0	0	0	2	0	0	0	0	1	0
0	3	1	0	2	0	0	0	0	0	0	0	0	0	3	0	1	3	0	2	0	0	0	0	0	0	0	0	0
1	5	6	9	2	8	7	10	13	3	11	4	12	14	14	14	10	9	6	13	7	8	5	2	12	4	11	3	1
1	14	13	4	3	6	5	2	7	12	9	8	11	10	14	14	1	2	11	12	9	10	13	8	3	6	7	4	5
1	2	3	5	4	6	7	8	9	10	11	12	13	14	14	14	13	12	10	11	9	8	7	6	5	4	3	2	1
2	5	1	0	0	4	3	0	0	0	0	0	0	0	5	4	1	5	0	0	2	3	0	0	0	0	0	0	0
1	3	2	6	7	8	11	12	4	5	10	9	13	14	14	14	12	13	9	8	7	4	3	11	10	5	6	2	1
1	2	4	3	0	6	7	8	5	0	0	0	0	0	8	8	7	5	6	0	3	2	1	4	0	0	0	0	0
6	0	0	1	0	0	0	0	3	2	0	4	0	5	6	1	0	0	6	0	0	0	0	4	5	0	3	0	2
7	1	8	2	6	0	3	9	4	5	10	11	13	12	13	7	13	6	12	8	0	11	5	10	9	4	3	1	2
1	2	3	4	0	0	5	6	7	0	8	0	0	9	9	9	8	7	6	0	0	5	4	3	0	2	0	0	1
1	3	2	5	9	10	4	13	8	6	11	7	12	14	14	14	12	13	10	6	5	11	2	7	9	4	8	3	1
1	0	2	3	0	4	0	0	0	0	0	0	0	0	4	4	0	3	2	0	1	0	0	0	0	0	0	0	0
2	1	3	4	0	0	0	0	0	0	0	0	5	0	5	4	5	3	2	0	0	0	0	0	0	0	0	1	0
1	0	2	3	0	0	4	5	0	6	7	8	9	10	10	10	0	9	8	0	0	7	6	0	5	4	3	2	1
1	0	0	2	0	0	0	0	0	3	4	5	0	0	5	5	0	0	4	0	0	0	0	0	3	2	1	0	0
1	3	2	4	5	0	0	0	0	0	0	6	0	0	6	6	4	5	3	2	0	0	0	0	0	0	1	0	0
1	0	0	2	0	0	0	0	0	0	0	0	0	0	2	2	0	0	1	0	0	0	0	0	0	0	0	0	0
2	9	1	6	5	13	8	14	10	7	3	4	11	12	14	13	6	14	9	10	2	7	1	5	8	12	11	4	3
1	2	3	4	0	5	0	0	0	0	0	0	0	0	5	5	4	3	2	0	1	0	0	0	0	0	0	0	0
14	1	13	2	3	4	5	6	7	8	9	10	11	12	14	1	14	2	13	12	11	10	9	8	7	6	5	4	3
3	2	1	8	7	5	4	14	6	9	10	11	13	12	14	12	13	14	7	8	10	11	1	9	6	5	4	2	3
1	0	2	5	6	0	0	3	0	4	0	0	0	0	6	6	0	5	2	1	0	0	4	0	3	0	0	0	0
1	4	2	9	10	11	3	12	8	5	6	7	14	13	14	14	11	13	6	5	4	12	3	7	10	9	8	1	2
4	5	3	1	2	14	12	13	10	9	8	7	11	6	14	11	10	12	14	13	1	3	2	5	6	7	8	4	9
1	0	2	3	4	0	0	0	5	0	0	0	6	7	7	7	0	6	5	4	0	0	0	3	0	0	0	2	1
1	2	12	11	10	9	3	14	8	5	4	13	7	6	14	14	13	3	4	5	6	12	1	7	10	11	2	8	9
0	0	1	2	3	0	0	0	0	4	0	0	0	0	4	0	0	4	3	2	0	0	0	0	1	0	0	0	0
3	0	4	1	2	5	6	0	0	7	8	9	10	11	11	9	0	8	11	10	7	6	0	0	5	4	3	2	1
6	5	4	1	2	7	8	14	9	3	10	11	12	13	14	9	10	11	14	13	8	7	1	6	12	5	4	3	2
4	0	3	0	0	0	0	0	0	0	2	1	0	0	4	1	0	2	0	0	0	0	0	0	0	3	4	0	0
0	3	2	1	0	0	0	0	0	0	0	0	0	0	3	0	1	2	3	0	0	0	0	0	0	0	0	0	0
1	0	0	0	0	0	2	3	0	4	5	6	0	0	6	6	0	0	0	0	0	5	4	0	3	2	1	0	0
1	0	0	2	0	0	0	0	0	4	3	0	0	0	4	4	0	0	3	0	0	0	0	0	1	2	0	0	0
1	2	3	5	4	9	10	11	12	6	7	8	13	14	14	14	13	12	10	11	6	5	4	3	9	8	7	2	1
1	2	0	0	0	0	0	0	5	4	0	0	3	0	5	5	4	0	0	0	0	0	0	1	2	0	0	3	0
2	1	4	8	7	9	5	6	13	12	3	11	10	14	14	13	14	11	7	8	6	10	9	2	3	12	4	5	1
0	1	0	2	0	0	0	0	3	0	0	4	0	5	5	0	5	0	4	0	0	0	0	3	0	0	2	0	1
4	2	1	3	0	8	6	9	5	7	10	11	12	13	13	10	12	13	11	0	6	8	5	9	7	4	3	2	1
2	1	8	9	12	11	3	13	7	4	5	6	10	14	14	13	14	7	6	3	4	12	2	8	11	10	9	5	1
1	2	12	5	6	7	4	8	9	3	10	11	13	14	14	14	13	3	10	9	8	11	7	6	12	5	4	2	1
3	2	1	8	6	10	7	14	13	4	9	11	12	5	14	12	13	14	7	9	5	8	1	2	11	6	4	3	10
0	8	7	3	4	0	0	0	2	1	0	6	0	5	8	0	1	2	6	5	0	0	0	7	8	0	3	0	4
5	4	3	1	2	0	0	0	7	6	0	0	0	0	7	3	4	5	7	6	0	0	0	1	2	0	0	0	0
1	0	0	0	2	0	0	0	0	0	0	0	3	0	3	3	0	0	0	2	0	0	0	0	0	0	0	1	0
0	0	0	2	0	0	3	0	1	0	0	0	0	0	3	0	0	0	2	0	0	1	0	3	0	0	0	0	0
0	1	5	0	0	0	0	0	2	3	4	0	0	0	5	0	5	1	0	0	0	0	0	4	3	2	0	0	0
1	3	4	0	0	0	0	0	0	2	0	0	0	0	4	4	2	1	0	0	0	0	0	0	3	0	0	0	0
2	9	1	6	10	12	4	11	5	8	7	3	14	13	14	13	6	14	9	5	3	11	4	10	7	8	12	1	2
															7.69318	7.50746	6.75641	6.5	6.49057	6.02174	6.86792	4.625	5.61111	6.1129	5.68627	5	2.69811	3.14815

## Sheet: 25
Q25_选项1	Q25_选项2	Q25_选项3	Q25_选项4	Q25_选项5	Q25_选项6	Q25_选项7	Q25_选项8
1	0	0	0	0	0	0	2	2	2	0	0	0	0	0	0	1
1	0	2	0	0	0	0	0	2	2	0	1	0	0	0	0	0
6	7	4	5	1	2	8	3	8	3	2	5	4	8	7	1	6
1	0	0	0	0	0	0	0	1	1	0	0	0	0	0	0	0
2	4	1	5	3	6	7	8	8	7	5	8	4	6	3	2	1
0	7	3	2	4	5	6	1	7	0	1	5	6	4	3	2	7
3	2	1	0	0	0	0	4	4	2	3	4	0	0	0	0	1
7	8	6	2	4	3	1	5	8	2	1	3	7	5	6	8	4
1	4	2	0	3	0	0	5	5	5	2	4	0	3	0	0	1
1	2	4	0	5	0	0	3	5	5	4	2	0	1	0	0	3
1	0	0	0	0	2	0	3	3	3	0	0	0	0	2	0	1
2	1	4	3	5	6	7	8	8	7	8	5	6	4	3	2	1
0	1	0	0	3	0	2	4	4	0	4	0	0	2	0	3	1
1	7	4	3	5	2	6	8	8	8	2	5	6	4	7	3	1
1	2	3	6	4	5	7	0	7	7	6	5	2	4	3	1	0
3	4	0	0	1	0	0	2	4	2	1	0	0	4	0	0	3
3	4	0	0	1	0	0	2	4	2	1	0	0	4	0	0	3
4	3	0	0	1	0	0	2	4	1	2	0	0	4	0	0	3
4	3	0	0	1	0	0	2	4	1	2	0	0	4	0	0	3
3	4	0	0	2	0	0	1	4	2	1	0	0	3	0	0	4
4	3	0	0	1	0	0	2	4	1	2	0	0	4	0	0	3
1	3	2	0	0	0	0	0	3	3	1	2	0	0	0	0	0
1	0	2	0	3	0	4	5	5	5	0	4	0	3	0	2	1
1	2	3	0	0	0	0	0	3	3	2	1	0	0	0	0	0
1	2	8	7	6	5	4	3	8	8	7	1	2	3	4	5	6
1	3	8	7	5	6	4	2	8	8	6	1	2	4	3	5	7
1	2	4	6	7	5	8	3	8	8	7	5	3	2	4	1	6
6	7	2	5	1	4	3	8	8	3	2	7	4	8	5	6	1
0	1	4	0	2	0	3	0	4	0	4	1	0	3	0	2	0
1	0	2	0	0	3	4	5	5	5	0	4	0	0	3	2	1
1	2	0	0	0	0	0	3	3	3	2	0	0	0	0	0	1
8	6	1	3	2	4	5	7	8	1	3	8	6	7	5	4	2
1	2	4	3	5	7	6	8	8	8	7	5	6	4	2	3	1
1	2	4	5	6	7	8	3	8	8	7	5	4	3	2	1	6
0	2	1	0	3	4	5	6	6	0	5	6	0	4	3	2	1
1	2	3	8	4	5	6	7	8	8	7	6	1	5	4	3	2
3	1	2	5	6	4	8	7	8	6	8	7	4	3	5	1	2
1	2	3	4	8	5	6	7	8	8	7	6	5	1	4	3	2
1	0	0	0	0	0	0	0	1	1	0	0	0	0	0	0	0
1	2	6	3	4	5	7	8	8	8	7	3	6	5	4	2	1
5	0	1	0	2	3	4	0	5	1	0	5	0	4	3	2	0
1	0	2	0	0	0	0	3	3	3	0	2	0	0	0	0	1
3	0	0	0	1	0	0	2	3	1	0	0	0	3	0	0	2
0	1	0	2	0	0	0	3	3	0	3	0	2	0	0	0	1
1	5	4	3	2	8	7	6	8	8	4	5	6	7	1	2	3
6	5	1	7	8	4	3	2	8	3	4	8	2	1	5	6	7
1	0	0	0	0	0	0	0	1	1	0	0	0	0	0	0	0
1	6	2	5	7	3	8	4	8	8	3	7	4	2	6	1	5
1	2	4	0	0	0	0	3	4	4	3	1	0	0	0	0	2
0	2	1	0	3	0	0	4	4	0	3	4	0	2	0	0	1
1	0	0	0	0	0	0	2	2	2	0	0	0	0	0	0	1
0	0	0	0	0	0	0	1	1	0	0	0	0	0	0	0	1
1	6	4	5	3	7	8	2	8	8	3	5	4	6	2	1	7
3	2	1	8	5	4	6	7	8	6	7	8	1	4	5	3	2
1	2	8	7	3	4	6	5	8	8	7	1	2	6	5	3	4
1	2	0	0	0	0	0	3	3	3	2	0	0	0	0	0	1
1	2	3	7	6	8	4	5	8	8	7	6	2	3	1	5	4
1	2	3	0	5	0	0	4	5	5	4	3	0	1	0	0	2
5	4	3	0	1	0	0	2	5	1	2	3	0	5	0	0	4
8	1	2	3	4	5	6	7	8	1	8	7	6	5	4	3	2
3	1	2	0	0	0	0	4	4	2	4	3	0	0	0	0	1
1	2	3	6	5	4	7	8	8	8	7	6	3	4	5	2	1
1	5	3	6	2	7	8	4	8	8	4	6	3	7	2	1	5
6	2	1	4	3	0	5	0	6	1	5	6	3	4	0	2	0
1	0	2	0	4	3	0	5	5	5	0	4	0	2	3	0	1
1	3	2	4	5	6	8	7	8	8	6	7	5	4	3	1	2
0	0	1	0	2	3	0	0	3	0	0	3	0	2	1	0	0
0	0	0	1	0	0	2	0	2	0	0	0	2	0	0	1	0
6	4	1	3	2	5	8	7	8	3	5	8	6	7	4	1	2
1	0	2	0	0	0	0	0	2	2	0	1	0	0	0	0	0
8	6	1	2	3	5	4	7	8	1	3	8	7	6	4	5	2
3	2	6	7	5	8	1	4	8	6	7	3	2	4	1	8	5
1	2	3	0	0	0	0	4	4	4	3	2	0	0	0	0	1
1	2	4	5	7	6	8	3	8	8	7	5	4	2	3	1	6
7	6	5	4	1	3	2	8	8	2	3	4	5	8	6	7	1
0	4	3	0	2	0	1	5	5	0	2	3	0	4	0	5	1
8	5	3	4	2	1	6	7	8	1	4	6	5	7	8	3	2
0	3	1	2	0	4	0	0	4	0	2	4	3	0	1	0	0
0	0	2	0	3	4	5	1	5	0	0	4	0	3	2	1	5
8	7	6	5	3	4	1	2	8	1	2	3	4	6	5	8	7
1	2	0	0	0	0	0	0	2	2	1	0	0	0	0	0	0
2	3	1	0	0	0	0	0	3	2	1	3	0	0	0	0	0
2	7	8	6	4	5	3	1	8	7	2	1	3	5	4	6	8
1	0	2	0	0	0	0	3	3	3	0	2	0	0	0	0	1
1	2	3	6	7	4	8	5	8	8	7	6	3	2	5	1	4
1	2	3	0	0	0	0	4	4	4	3	2	0	0	0	0	1
2	1	3	7	4	5	6	8	8	7	8	6	2	5	4	3	1
1	0	2	3	4	5	6	0	6	6	0	5	4	3	2	1	0
3	1	2	5	4	6	7	8	8	6	8	7	4	5	3	2	1
2	3	1	8	5	6	7	4	8	7	6	8	1	4	3	2	5
1	2	3	8	4	6	7	5	8	8	7	6	1	5	3	2	4
1	4	2	5	0	3	7	6	7	7	4	6	3	0	5	1	2
4	3	0	0	2	0	0	1	4	1	2	0	0	3	0	0	4
5	4	3	0	1	0	2	0	5	1	2	3	0	5	0	4	0
1	0	2	3	0	4	5	0	5	5	0	4	3	0	2	1	0
0	4	0	0	2	0	3	1	4	0	1	0	0	3	0	2	4
2	1	0	0	0	0	0	3	3	2	3	0	0	0	0	0	1
2	3	4	0	0	0	0	1	4	3	2	1	0	0	0	0	4
1	4	3	6	5	8	7	2	8	8	5	6	3	4	1	2	7
									4.36047	4.03846	4.42105	3.72	4.08696	3.59259	2.81034	2.825
